# Supplementary material for: Solution-processed single-emissive-layer WOLEDs with high efficiency and ultra-high color rendering index beyond 90
Source: Royal Society of Chemistry journal article supplement (doi:10.1039/d2tc05257a), 2023-01-01
Supplement: d2tc05257a1.pdf [file d2tc05257a1.pdf]

# Solution-Processed Single-Emissive-Layer WOLEDs with High Efficiency and Ultra-High Color Rendering Index Beyond 90

Dongling Zhou,<sup>†</sup> Gang Cheng,<sup>†\*</sup> Weiqiang Liu, Siping Wu and Chi-Ming Che<sup>\*</sup>

## Supporting Information

### 1. General experimental section:

OTPD, PYD2, DBP, DPEPO, TPBi and LiF were purchased from Luminescence Technology Corp, PEDOT: PSS from Heraeus. All of these materials were used as received without further purification. Emitters **Au-1**,<sup>1</sup> **Au-7**,<sup>2</sup> and **Au-8**<sup>2</sup> were synthesized according to reported procedures. The HOMO/LUMO energy levels of Au(III) complexes were estimated based on the formula of  $E_{\text{HOMO/LUMO}} = -[4.8 + (E_{\text{onset}}^{\text{ox/red}} \text{ versus ferrocene } E_{1/2})]$  eV. The redox potentials of gold(III) complexes in *N,N*-dimethylformamide were recorded with 0.1 mol dm<sup>-3</sup> [*n*Bu<sub>4</sub>N]PF<sub>6</sub> as supporting electrolyte and saturated calomel electrode (SCE) as the reference electrode.<sup>1-2</sup>

The procedure for the preparation of thin-film samples for PL studies is described as follows: the mixture of PYD2 and dopant(s) in chlorobenzene (10 mg mL<sup>-1</sup>) was spin coated on quartz films (1 × 1 cm) at a speed of 500 rpm inside a glove box and transparent film samples were obtained after being annealed at 70°C for 20 minutes. Emission quantum yields of these thin-film samples were measured with Hamamatsu C11347 Quantaurus-QY Absolute PL quantum yields measurement system under argon atmosphere. Emission spectra of these thin-film samples were recorded on a Horiba

Fluorolog-3 spectrophotometer. The emission lifetime measurements were performed on a LP920-KS Laser Flash Photolysis spectrophotometer (Edinburgh Instrument Ltd.) equipped with a Q-switched Nd:YAG laser. The procedure for the preparation of thin-film samples for AFM measurement is described as follows: the mixture of PYD2 and dopant(s) in chlorobenzene (10 mg mL<sup>-1</sup>) was spin coated on quartz slides covered by PEDOT: PSS at a speed of 3000 rpm inside a glove box and the transparent thin films were obtained after being annealed at 70°C for 20 minutes. The prepared films were examined by atomic force microscope (AFM) with tapping mode (Bruker Nano Wizard ULTRA Speed 2).

**Characterization data of Au-1, Au-7, and Au-8:**

For **Au-1**, <sup>1</sup>H NMR (500 MHz, CD<sub>2</sub>Cl<sub>2</sub>): δ/ppm = 7.45 (d, *J* = 8.5 Hz, 2H), 7.27 (t, *J* = 8.5 Hz, 4H), 7.14 (d, *J* = 8.0 Hz, 4H), 7.07–7.04 (m, 4H), 7.00 (t, *J* = 7.5 Hz, 2H), 6.92 (dd, *J* = 2.5, 7.5 Hz, 2H), 6.66–6.61 (m, 2H), 3.16 (s, 6H); <sup>19</sup>F NMR (470 MHz, CD<sub>2</sub>Cl<sub>2</sub>): δ/ppm = -109.4, -111.6; <sup>13</sup>C NMR (150 MHz, CD<sub>2</sub>Cl<sub>2</sub>): δ/ppm = 170.45, 164.03 (dd, *J* = 10.5, 256.9 Hz), 161.70 (dd, *J* = 10.5, 259.5 Hz), 158.72 (d, *J* = 6.2 Hz), 158.04, 148.59, 145.04, 143.00, 134.62, 133.77, 129.51, 126.07, 124.03, 122.53, 117.81 (d, *J* = 20.0 Hz), 102.81 (d, *J* = 19.4 Hz), 102.50 (t, *J* = 26.5 Hz), 40.10; MS (FAB): *m/z* 785.2939 (M<sup>+</sup>); Elemental analysis calculated (%) for C<sub>37</sub>H<sub>26</sub>AuF<sub>4</sub>N<sub>3</sub>: C, 56.57; H, 3.34; N, 5.35; found: C, 57.04; H, 3.28; N, 5.29.

For **Au-7**, <sup>1</sup>H NMR (400 MHz, CD<sub>2</sub>Cl<sub>2</sub>): δ/ppm = 8.83 (s, 2H), 8.22 (d, *J* = 2.0 Hz, 2H), 7.67 (d, *J* = 8.2 Hz, 2H), 7.36 (dd, *J* = 8.2, 2.0 Hz, 2H), 7.29–7.25 (m, 4H), 7.10 (d, *J* = 7.5 Hz, 4H), 7.03 (t, *J* = 7.3, 2H), 6.82 (s, 2H), 2.61 (s, 6H), 1.36 (s, 18H); <sup>13</sup>C NMR (126 MHz, CD<sub>2</sub>Cl<sub>2</sub>): δ/ppm = 168.53, 157.92, 157.16, 148.32, 146.67, 144.88, 141.86, 138.85, 134.98, 129.76, 126.00, 125.01, 124.54, 123.35, 122.41, 120.76, 99.23, 98.30, 36.07, 31.55, 22.67; IR(KBr): ν = 2137 cm<sup>-1</sup> (ν(C≡C)); MS(MALDI): *m/z* 835.3104 (M<sup>+</sup>); Elemental analysis calculated (%) for C<sub>46</sub>H<sub>44</sub>AuN<sub>3</sub>: C, 66.10; H, 5.31; N, 5.03; found: C, 65.91; H, 5.36; N, 4.85.

For **Au-8**,  $^1\text{H}$  NMR (500 MHz,  $\text{CD}_2\text{Cl}_2$ ):  $\delta/\text{ppm}$  = 8.83 (s, 2H), 8.19 (d,  $J$  = 2.0 Hz, 2H), 7.81 (d,  $J$  = 8.5 Hz, 2H), 7.67 (d,  $J$  = 8.5 Hz, 2H), 7.38 (dd,  $J$  = 8.5, 2.0 Hz, 2H), 7.34 (d,  $J$  = 8.5 Hz, 2H), 6.69–6.61 (m, 6H), 6.03–6.01 (m, 2H), 1.41 (s, 18H);  $^{13}\text{C}$  NMR (126 MHz,  $\text{CD}_2\text{Cl}_2$ ):  $\delta/\text{ppm}$  = 168.23, 157.89, 157.02, 144.69, 144.35, 138.77, 138.09, 134.85, 134.73, 134.21, 131.09, 127.19, 125.92, 124.68, 123.72, 121.71, 115.67, 113.77, 101.26, 93.56, 35.86, 31.30; IR(KBr):  $\nu$  = 2154  $\text{cm}^{-1}$  ( $\nu(\text{C}\equiv\text{C})$ ); MS(MALDI):  $m/z$  821.2573 ( $\text{M}^+$ ); Elemental analysis calculated (%) for  $\text{C}_{44}\text{H}_{38}\text{AuN}_3\text{O}\cdot 0.5\text{CH}_2\text{Cl}_2$ : C, 61.84; H, 4.55; N, 4.86; found: C, 61.55; H, 4.47; N, 4.82.

### Estimation of Förster radius:<sup>3</sup>

The Förster distance ( $R_{\text{FRET}}$ ) is commonly utilized to evaluate the efficiency of a FRET process and can be expressed as the following equation:

$$(R_{\text{FRET}})^6 = \Phi_{\text{D}}\kappa^2 \left( \frac{9000(\ln 10)}{128\pi^5 N_{\text{A}} n^4} \right) \int_0^{\infty} F_{\text{D}}(\lambda) \varepsilon_{\text{A}}(\lambda) \lambda^4 d\lambda \quad (\text{in } \text{\AA}^6)$$

where  $\Phi_{\text{D}}$  is the emission quantum yield of the donor in the absence of the acceptor, and  $\kappa^2$  is usually taken as 2/3 which is appropriate for dynamic random averaging of the donor and acceptor.  $n$  is the refractive index, whose value is taken as 1.49 for PMMA and 1.7 for other host materials.  $F_{\text{D}}(\lambda)$  stands for the normalized emission spectrum of donor.  $\varepsilon_{\text{A}}(\lambda)$  and  $N_{\text{A}}$  are the molar absorptivity of the acceptor and the Avogadro's number, respectively.

## **2. Fabrication and characterization of OLEDs:**

An aqueous solution of PEDOT:PSS was spin-coated onto a cleaned ITO coated glass substrate and baked at 120 °C for 20 minutes to remove the residual water solvent in a clean room. The cross-linkable OTPD in toluene was spin-casted on top of the PEDOT:PSS layer and heated at 200 °C for 30 minutes to carry out cross-linking inside a  $\text{N}_2$ -filled glove box. The cross-linked OTPD was then subjected three times to a spin-

casted chlorobenzene solvent to remove the unreacted moieties. Afterwards, the mixture of PYD2 and emitting dopant(s) in chlorobenzene was spin-coated atop the OTPD layer inside the glove box. After being annealed at 70 °C for 30 minutes, all devices were subsequently transferred into a Kurt J. Lesker SPECTROS vacuum deposition system without exposure to air. In the vacuum chamber, organic materials of DPEPO and TPBi were thermally deposited in sequence at a rate of  $\sim 0.1 \text{ nm s}^{-1}$ . Finally, LiF (1.2 nm) and Al (100 nm) were thermally deposited at rates of 0.03 and 0.2  $\text{nm s}^{-1}$ , respectively.

EL spectra, CIE coordinates, CRI, CRI R<sub>9</sub>, luminance-current-voltage characteristics, current efficiency, power efficiency and EQE were measured using a Keithley 2400 source-meter and an absolute external quantum efficiency measurement system (C9920-12, Hamamatsu Photonics). All devices were characterized at room temperature in ambient air environment without encapsulation. The efficiency roll-offs were evaluated based on the formula of  $[(\text{EQE}_{\text{max}} - \text{EQE}_{1000}) / \text{EQE}_{\text{max}}] \times 100\%$ , in which  $\text{EQE}_{\text{max}}$  and  $\text{EQE}_{1000}$  refer to maximum EQE and EQE at a luminance of 1000  $\text{cd m}^{-2}$  respectively.

Structural drawings of other supportive materials used in OLED fabrication:

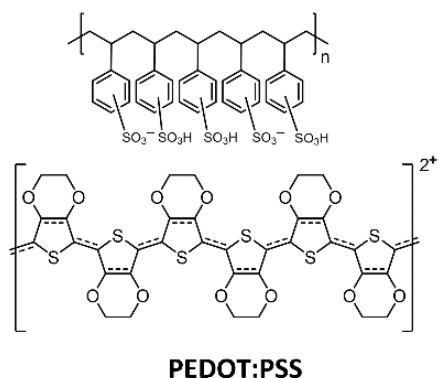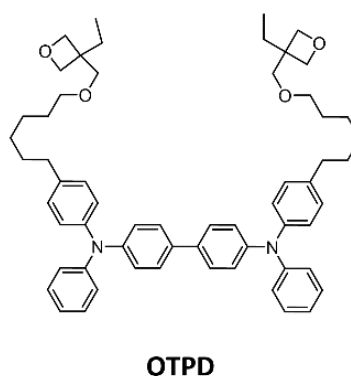

### 3. Additional data:

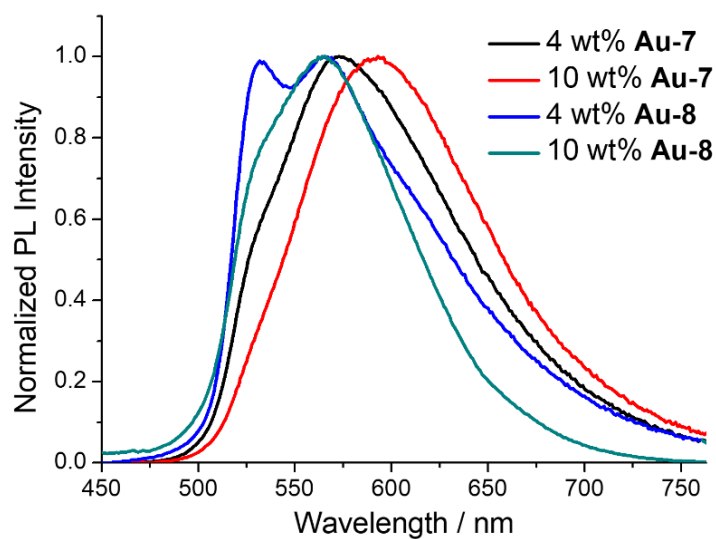

**Figure S1.** Normalized PL spectra of **Au-7** and **Au-8** doped in PYD2 thin films at different doping concentrations.

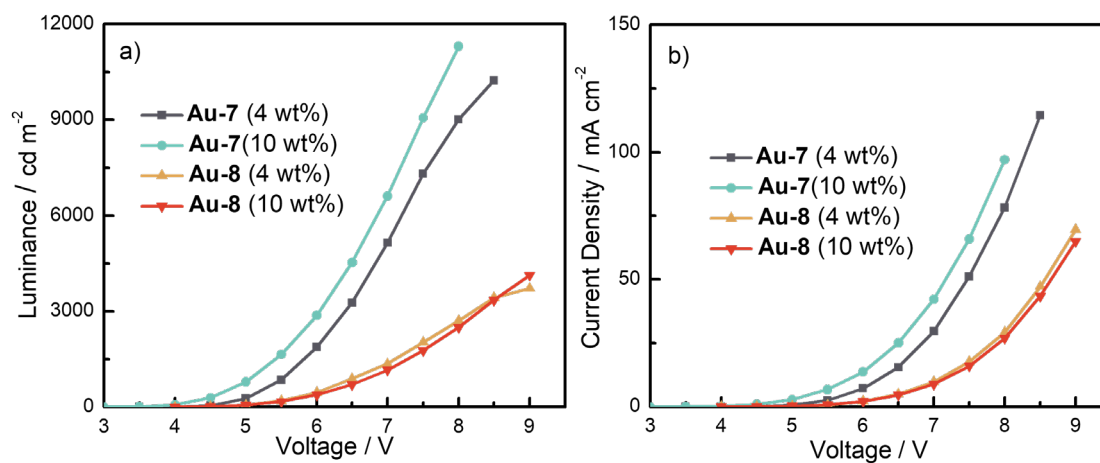

**Figure S2.** a) Luminance–voltage and b) current density–voltage characteristics of SP-OLEDs based on **Au-7** or **Au-8** at different doping concentrations.

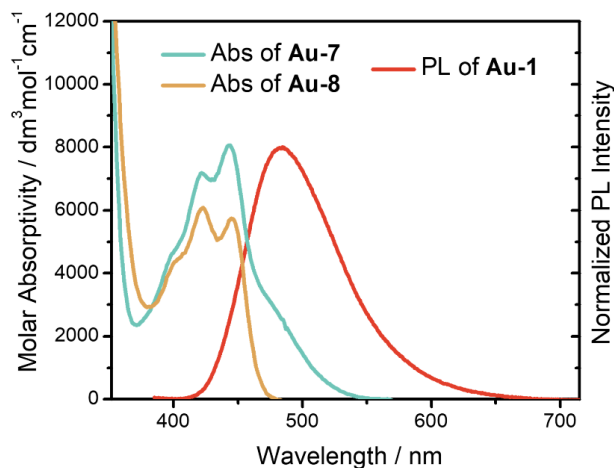

**Figure S3.** Absorption spectra of **Au-7** and **Au-8** in toluene solution ( $2 \times 10^{-5}$  mol dm $^{-3}$ ) and emission spectrum of **Au-1** (4 wt%) doped in PMMA thin film. [The overlap of the emission spectrum of **Au-1** and the absorption spectrum of **Au-7** gives a spectral integral  $J(\lambda)$  of  $7.81 \times 10^{13}$  M $^{-1}$  cm $^{-1}$  nm $^4$ , while the spectral overlap between **Au-1** and **Au-8** affords a spectral integral  $J(\lambda)$  of  $1.45 \times 10^{13}$  M $^{-1}$  cm $^{-1}$  nm $^4$ .]

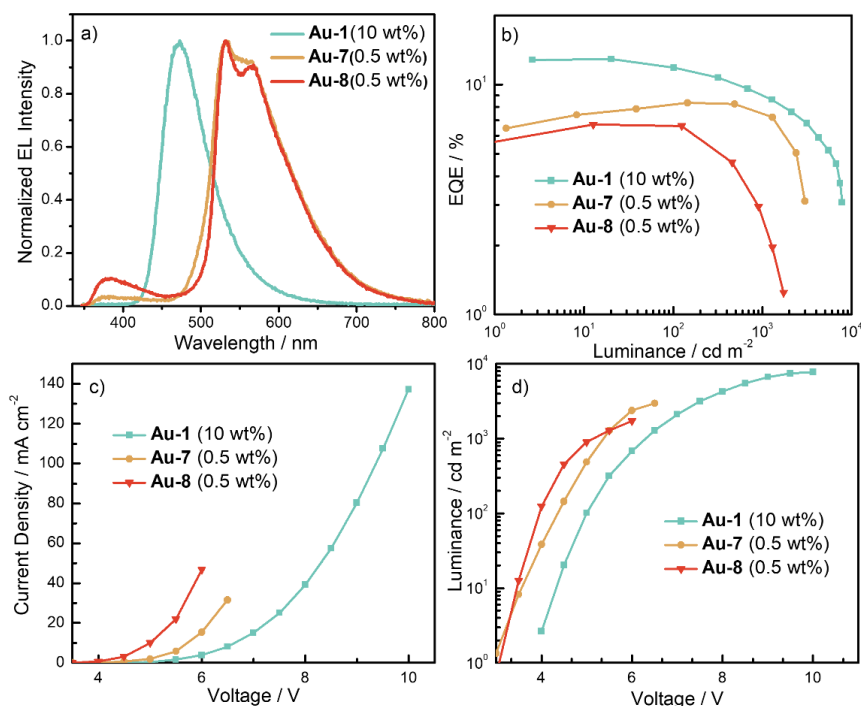

**Figure S4.** a) Normalized EL spectra, b) EQE–luminance, c) current density–voltage and d) luminance–voltage characteristics of devices based on **Au-1** (10 wt%), **Au-7** (0.5 wt%) or **Au-8** (0.5 wt%). [In the EL spectra of devices based on 0.5 wt% **Au-7** or **Au-8**, the emission at 380 nm stems from the PYD2 host.]

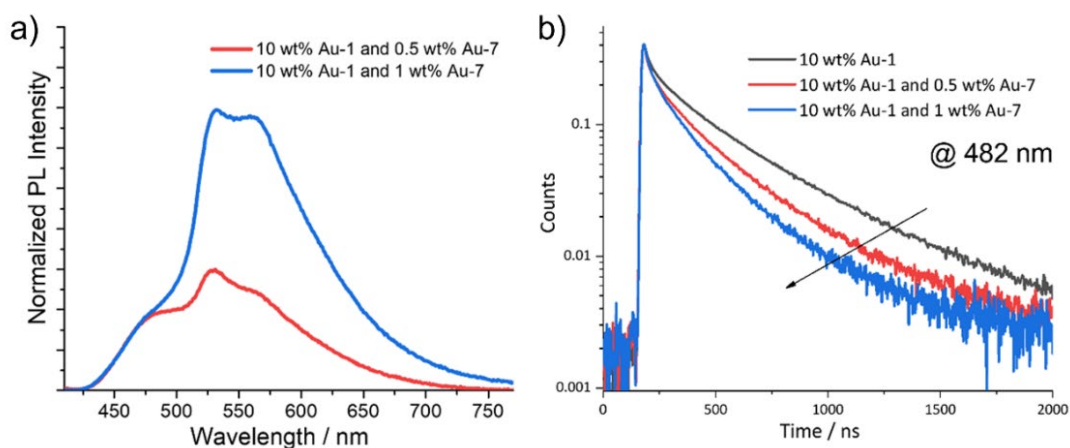

**Figure S5.** a) Emission spectra and b) PL decay curves of PYD2 thin films doped with different blend ratios of **Au-1** and **Au-7**. (The decay curves were measured at 482 nm under air). The lifetimes of the 10 wt% **Au-1** doped film, the 10 wt% **Au-1**:0.5 wt% **Au-7** co-doped film, and the 10 wt% **Au-1**:1 wt% **Au-7** co-doped film are 0.52, 0.22, and 0.16  $\mu$ s, respectively.

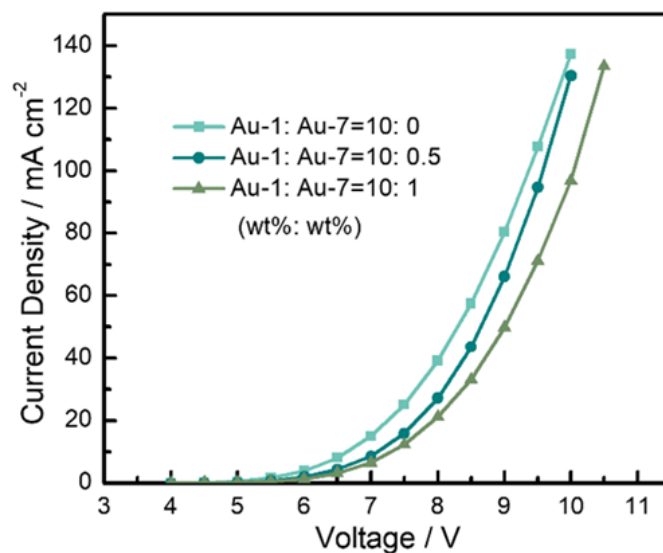

**Figure S6.** Current density–voltage characteristics of devices with different blend ratios of **Au-1** and **Au-7**.

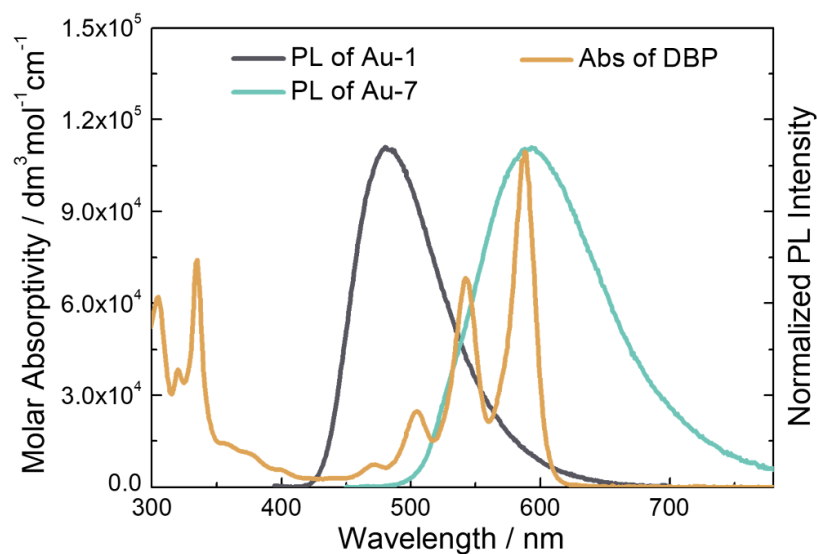

**Figure S7.** Absorption spectrum of DBP in toluene solution ( $2 \times 10^{-5}$  mol dm $^{-3}$ , orange line) and normalized emission spectra of **Au-1** (10 wt%, black line) and **Au-7** (10 wt%, green line) in PYD2 thin films. [The overlap of the emission spectrum of **Au-1** and the absorption spectrum of DBP gives a spectral integral  $J(\lambda)$  of  $1.34 \times 10^{15}$  M $^{-1}$  cm $^{-1}$  nm $^4$ , while the spectral overlap between **Au-7** and DBP affords a spectral integral  $J(\lambda)$  of  $4.12 \times 10^{15}$  M $^{-1}$  cm $^{-1}$  nm $^4$ .]

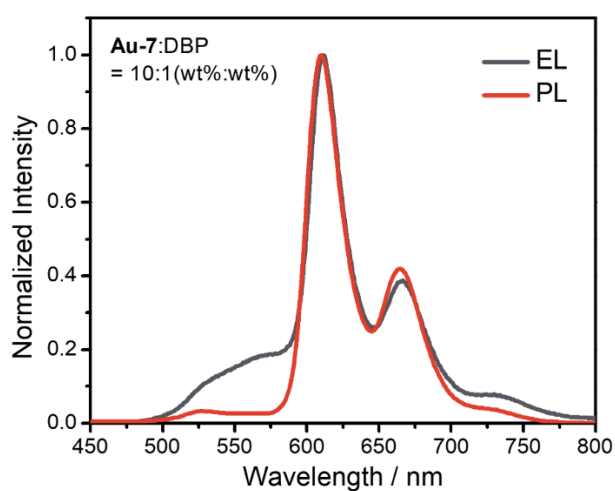

**Figure S8.** Normalized PL spectrum (red line) of the 10 wt% **Au-7**:1 wt% DBP co-doped film and normalized EL spectrum (black line) of the 10 wt% **Au-7**:1 wt% DBP-based device.



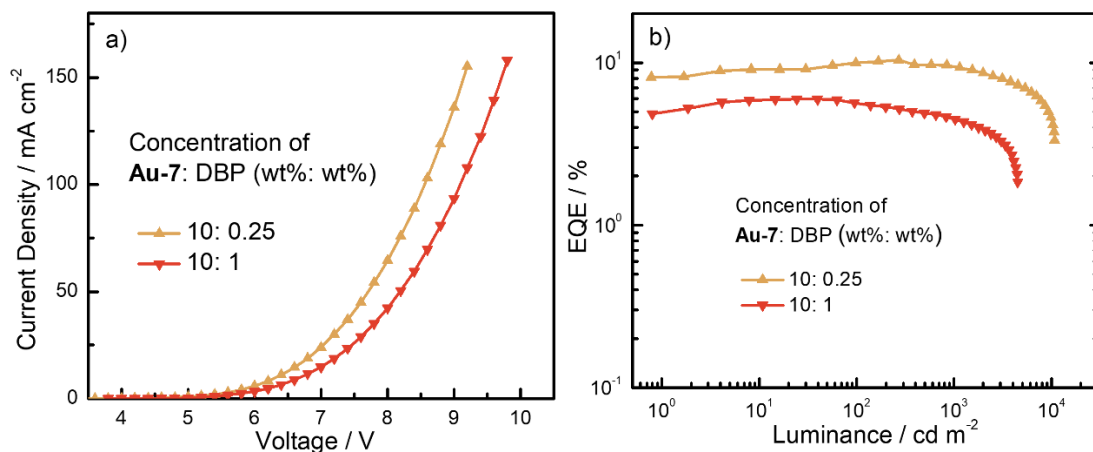

**Figure S9.** a) Current density–voltage b) EQE–luminance characteristics of OLEDs based on **Au-7** and DBP at different concentrations.

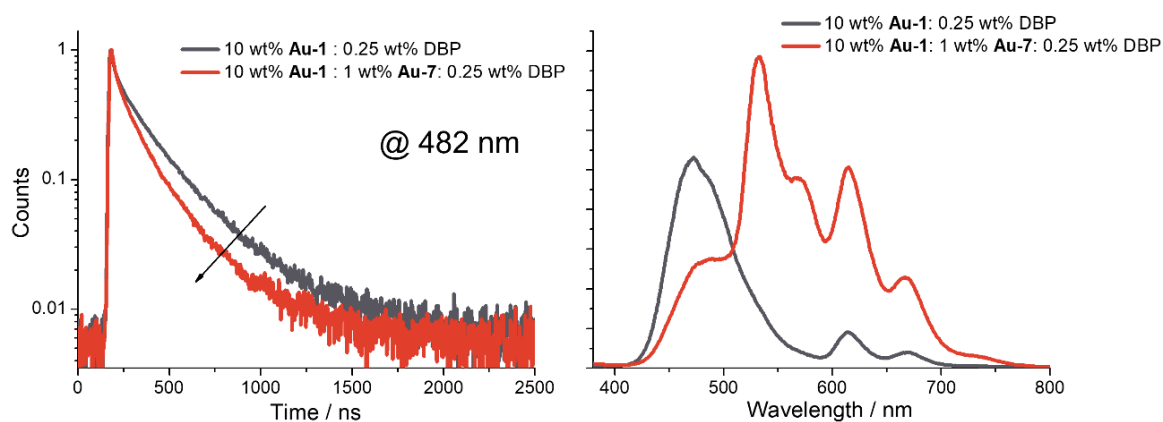

**Figure S10.** PL decay curves (left) and emission spectra (right) of the studied thin-film samples (the decay curves were measured at 482 nm under air). The weighted lifetimes of the 10 wt% **Au-1**:0.25 wt% DBP and 10 wt% **Au-1**:1 wt% **Au-7**:0.25 wt% DBP co-doped films are 0.19 and 0.14  $\mu$ s, respectively.

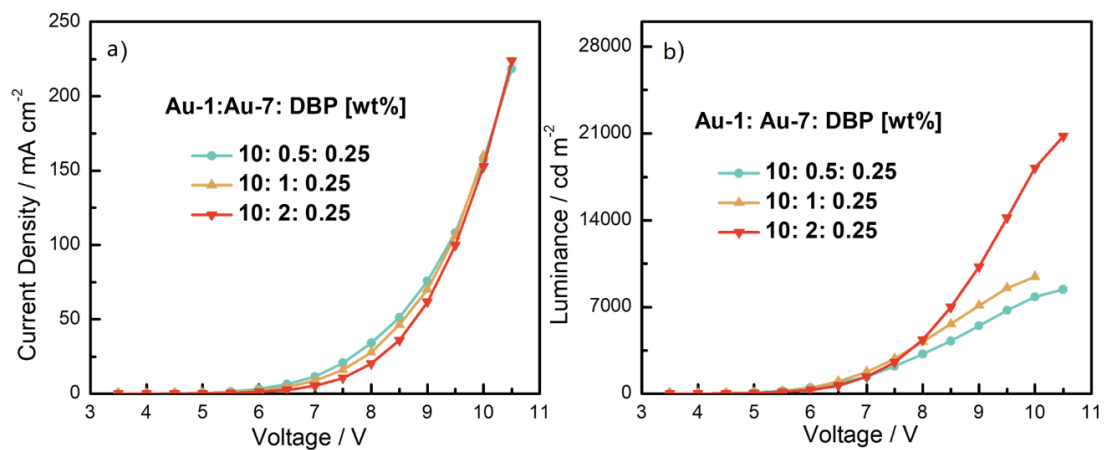

**Figure S11.** a) Current density–voltage and b) luminance–voltage characteristics of three-color WOLEDs based on **Au-1**, **Au-7**, and DBP at different doping concentrations.

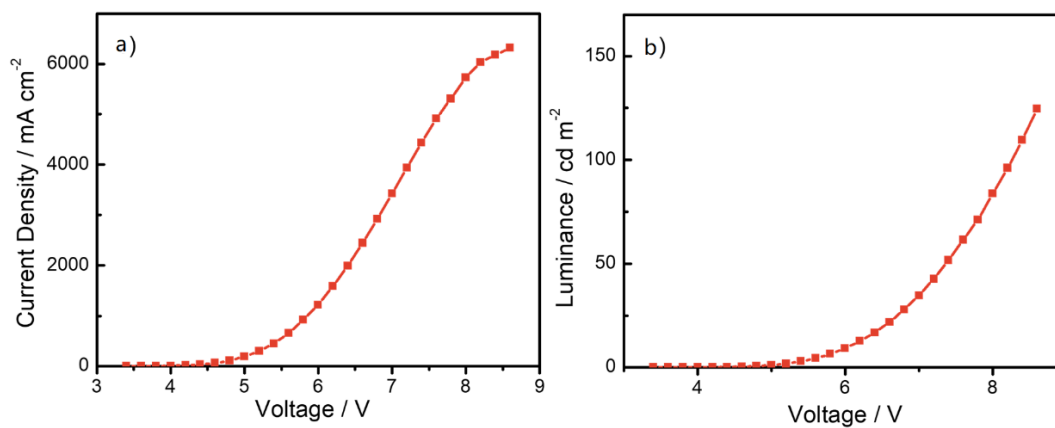

**Figure S12.** a) Current density–voltage and d) luminance–voltage characteristics of the three-color WOLED based on **Au-1** (10 wt%), **Au-8** (1 wt%), and DBP (0.25 wt%).

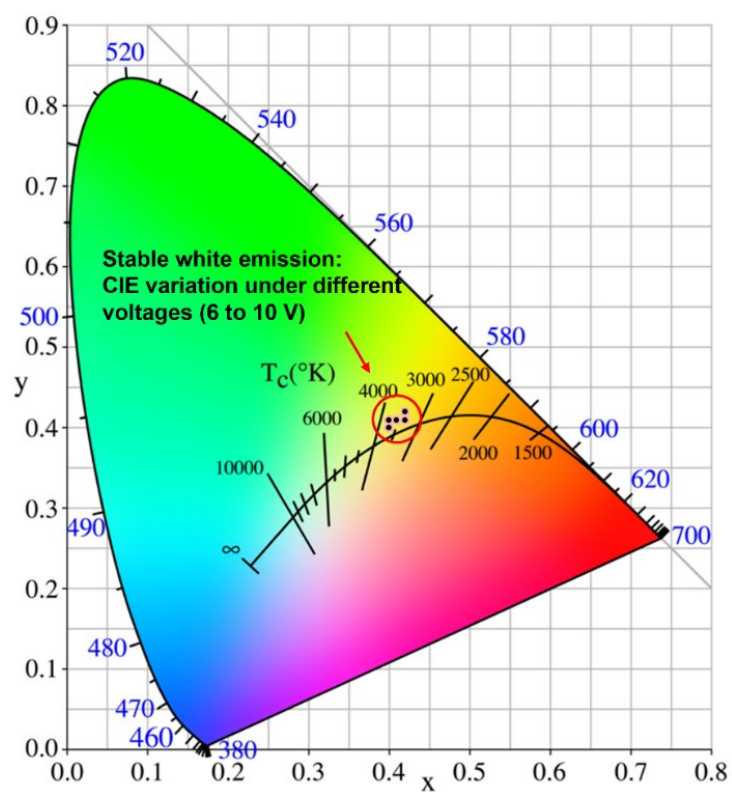

**Figure S13.** CIE Coordinates of the device based on **Au-1** (10 wt %), **Au-7** (1 wt%), and DBP (0.25 wt%) at different driving voltages (6–10 V).

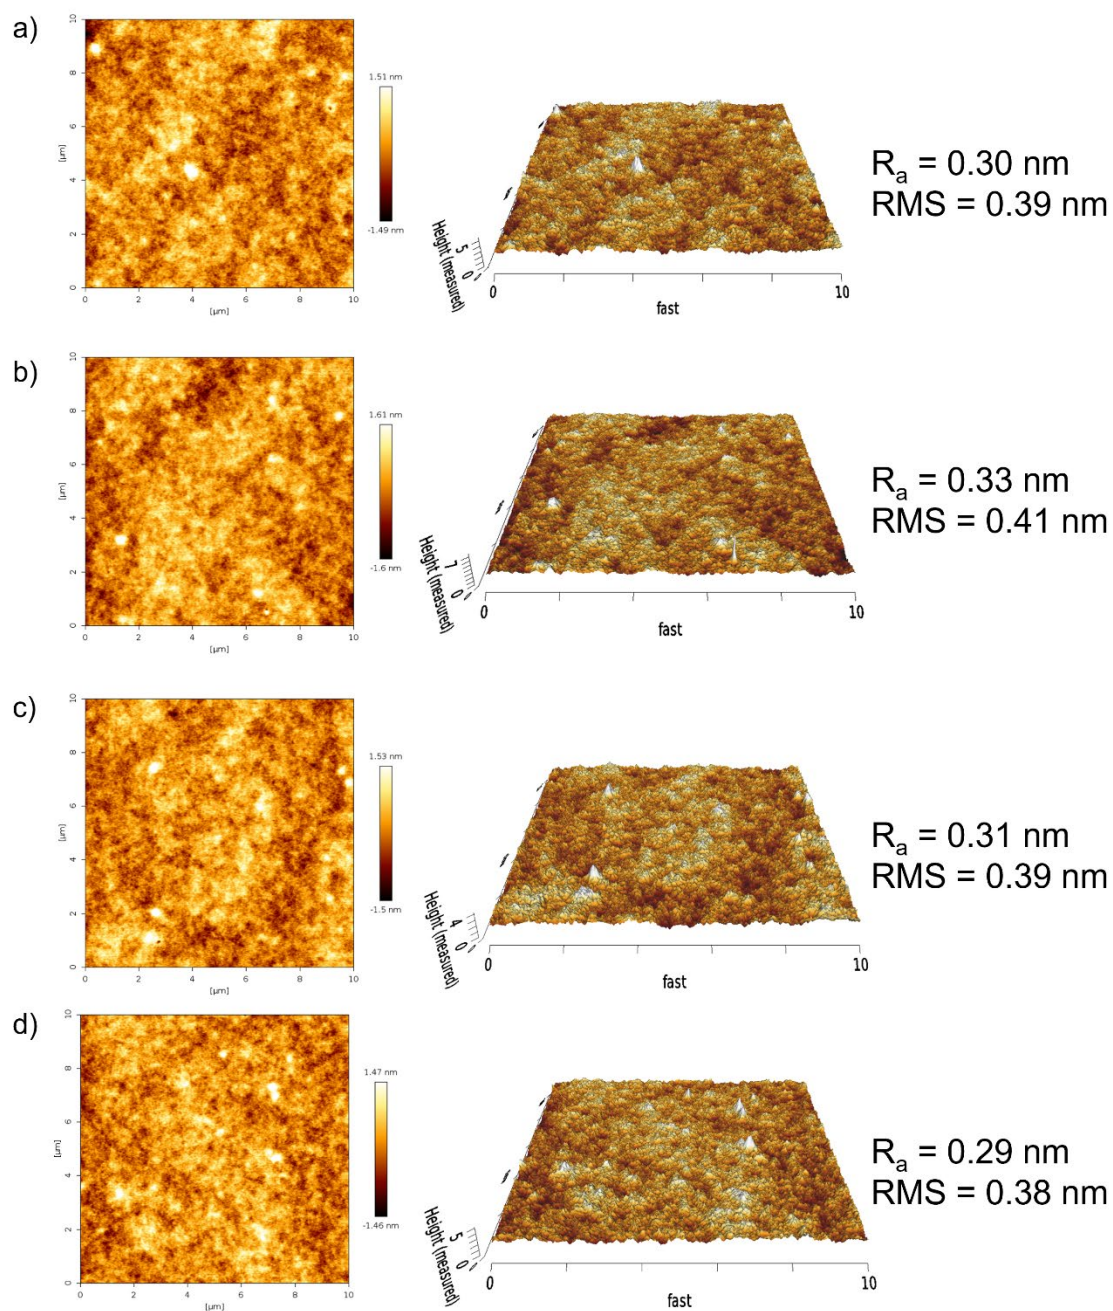

**Figure S14.** 2D and 3D AFM images ( $10 \times 10 \text{ } \mu\text{m}^2$ ) of four PYD2 thin-film samples with corresponding  $R_a$  and RMS values: a) 10 wt% **Au-1**:0.5 wt% **Au-7**, b) 10 wt% **Au-1**:0.5 wt% **Au-8**, c) 10 wt% **Au-1**:1 wt% **Au-7**:0.25 wt% DBP, and d) 10 wt% **Au-1**:1 wt% **Au-8**:0.25 wt% DBP.

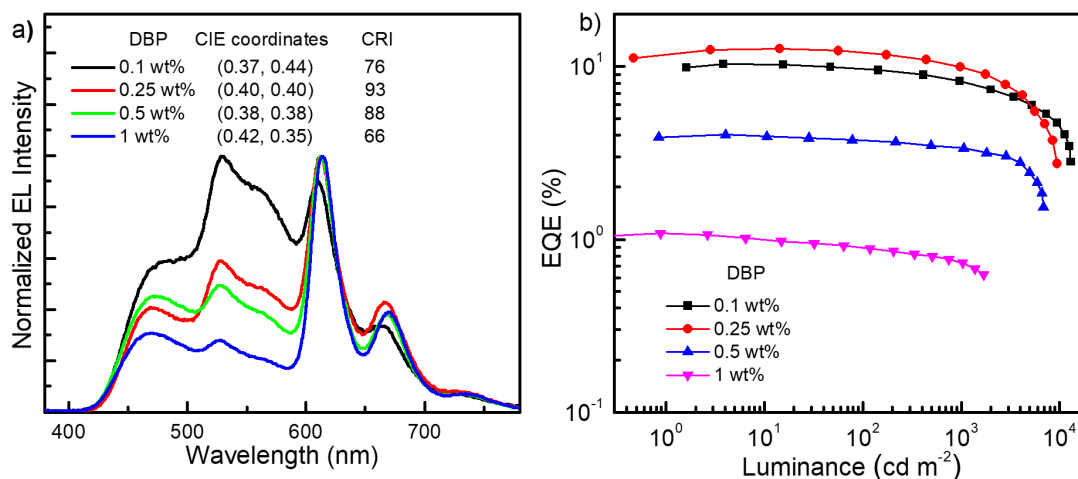

**Figure S15.** Optimization of WOLEDs based on **Au-1**, **Au-7**, and DBP. The doping concentrations of **Au-1** and **Au-7** were set to 10 wt% and 1 wt%, respectively, while the concentration of DBP ranged from 0.1 to 1 wt%. a) Normalized EL spectra and b) respective EQEs as a function of luminance of the studied three-component WOLEDs.

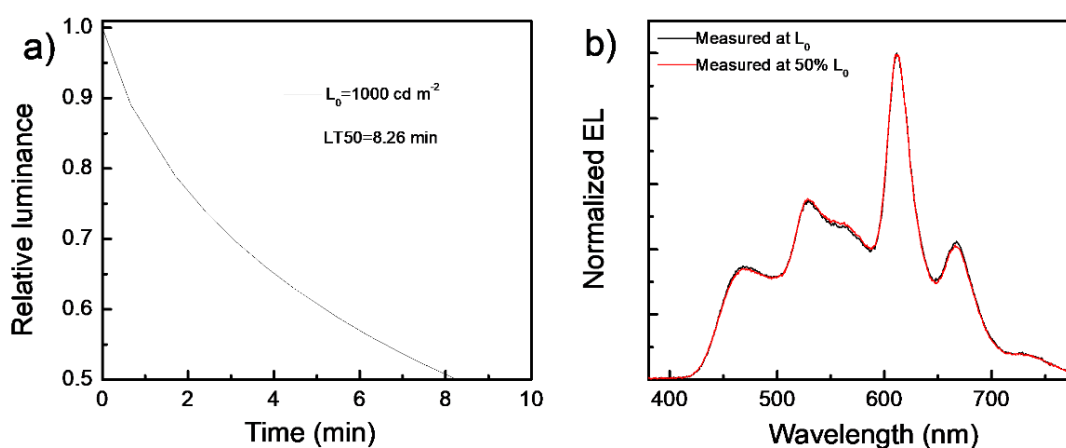

**Figure S16.** a) Relative luminance against operation time of the device based on **Au-1** (10 wt%), **Au-7** (1 wt%), and DBP (0.25 wt%) at an initial luminance ( $L_0$ ) of 1000  $\text{cd m}^{-2}$ ; b) Normalized EL spectra of the WOLED before and after lifetime measurement.

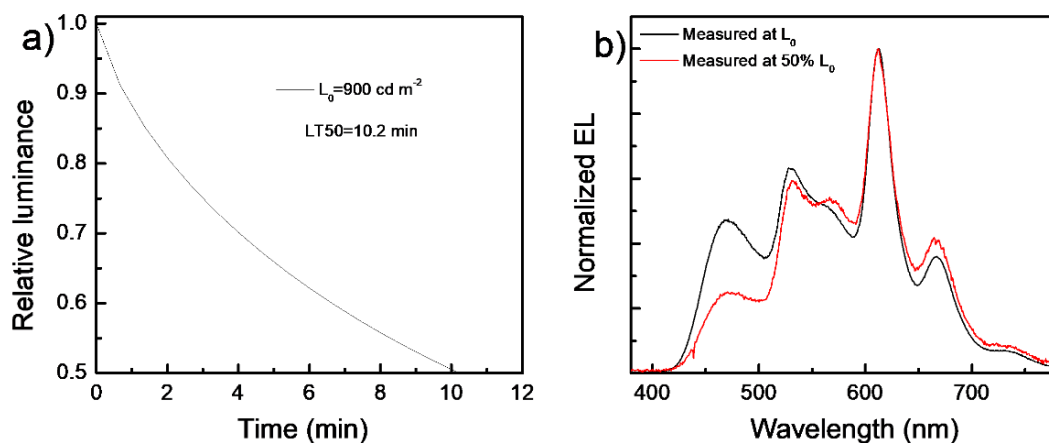

**Figure S17.** a) Relative luminance against operation time of the device based on **Au-1** (10 wt%), **Au-8** (1 wt%), and DBP (0.25 wt%) at an initial luminance ( $L_0$ ) of  $900 \text{ cd m}^{-2}$ ; b) Normalized EL spectra of the WOLED before and after lifetime measurement.

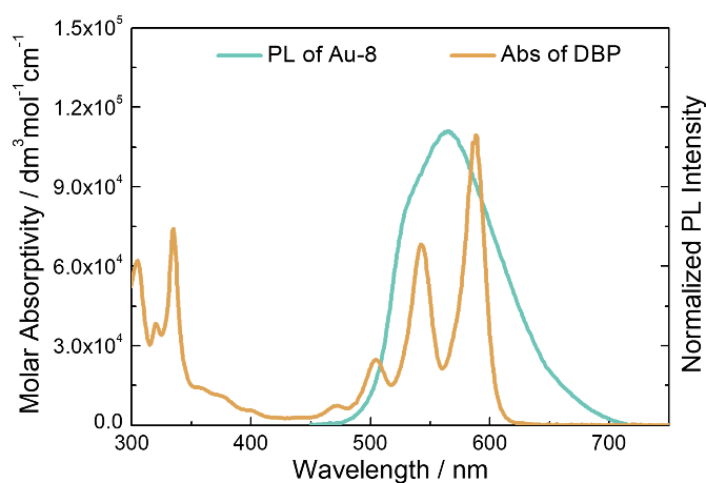

**Figure S18.** Absorption spectrum of DBP in toluene solution ( $2 \times 10^{-5} \text{ mol dm}^{-3}$ ) and normalized emission spectrum of **Au-8** (10 wt% doped in the PYD2 host). [The overlap of the emission spectrum of **Au-8** and the absorption spectrum of DBP afforded a spectral integral  $J(\lambda)$  of  $3.67 \times 10^{15} \text{ M}^{-1} \text{ cm}^{-1} \text{ nm}^4$ , and accordingly, the  $R_{\text{FRET}}$  for **Au-8**/DBP was calculated to be 4.39 nm.]

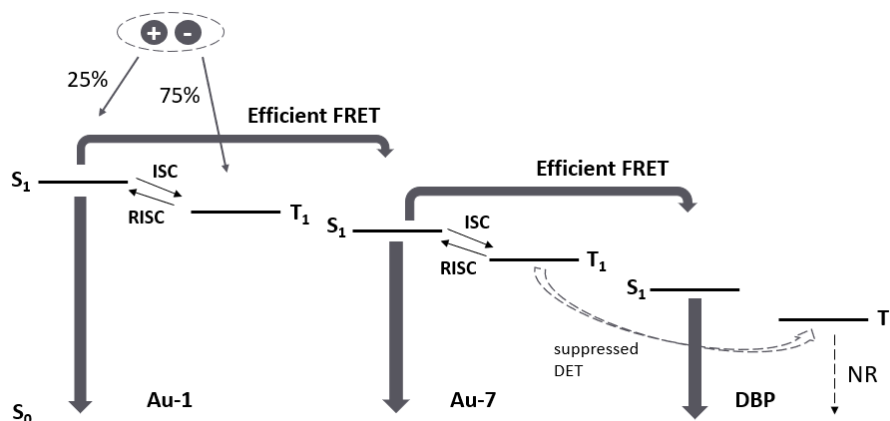

**Figure S19.** Proposed primary energy transfer and emission decay processes of the studied WOLEDs.

**Table S1.** Photophysical data of **Au-7** and **Au-8** doped in PYD2 thin films.

| Emitter              | $\lambda_{\text{em}}$ [nm] <sup>a)</sup> | FWHM [nm; cm <sup>-1</sup> ] | $\Phi$ [%] <sup>b)</sup> | $\tau$ [ $\mu$ s] <sup>b)</sup> | $k_r \times 10^5$ [s <sup>-1</sup> ] |
|----------------------|------------------------------------------|------------------------------|--------------------------|---------------------------------|--------------------------------------|
| <b>Au-7</b> (4 wt%)  | 573                                      | 119; 3514                    | 71                       | 0.95                            | 7.45                                 |
| <b>Au-7</b> (10 wt%) | 592                                      | 115; 3226                    | 63                       | 1.03                            | 6.12                                 |
| <b>Au-8</b> (4 wt%)  | 532, 564                                 | 115; 3520                    | 33                       | 3.61, 0.28 <sup>c)</sup>        | --                                   |
| <b>Au-8</b> (10 wt%) | 532sh, 564                               | 99; 3098                     | 28                       | 1.25                            | 2.24                                 |

a) “sh” stands for shoulder; b) emission quantum yields ( $\Phi$ ) and emission lifetimes ( $\tau$ ) were measured under argon atmosphere; c) measured at 564 nm.

**Table S2.** Emission data of co-doping systems.

| Co-doping system                                         | $\lambda_{\text{em}}$ [nm] | $\Phi$ [%] |
|----------------------------------------------------------|----------------------------|------------|
| <b>Au-1</b> (10 wt%): <b>Au-7</b> (0.5 wt%)              | 482, 528, 563              | 65         |
| <b>Au-1</b> (10 wt%): <b>Au-7</b> (1 wt%)                | 482, 531, 562              | 57         |
| <b>Au-1</b> (10 wt%): <b>Au-8</b> (0.5 wt%)              | 482, 528, 564              | 55         |
| <b>Au-1</b> (10 wt%): <b>Au-8</b> (1 wt%)                | 482, 529, 564              | 38         |
| <b>Au-1</b> (10 wt%): <b>Au-7</b> (1 wt%):DBP (0.25 wt%) | 482, 532, 569, 615, 667    | 48         |
| <b>Au-1</b> (10 wt%): <b>Au-8</b> (1 wt%):DBP (0.25 wt%) | 482, 530, 568, 616, 667    | 33         |

**Table S3.** Key performances of single-EML SP-WOLEDs reported in this work and in the literature.

| Device type             | EQE (%) |                               | CE <sub>max</sub> (cd A <sup>-1</sup> ); | CIE (x, y) | CRI  | Ref.             |
|-------------------------|---------|-------------------------------|------------------------------------------|------------|------|------------------|
|                         | Max     | At 1000<br>cd m <sup>-2</sup> | PE <sub>max</sub> (lm W <sup>-1</sup> )  |            |      |                  |
| Two-color WOLED         | 17.84   | 16.45                         | 49.78; 30.63                             | 0.30, 0.40 | 71   | <b>This Work</b> |
| Three-color WOLED       | 12.72   | 9.95                          | 28.51; 22.28                             | 0.40, 0.40 | 93   | <b>This Work</b> |
| Two-color WOLED         | 20.8    | 11.8                          | N/A; 31.3                                | 0.33, 0.39 | 76   | 4a               |
|                         | 12.32   | N/A                           | 28.8; 18.1                               | 0.38, 0.44 | 67   | 4b               |
|                         | 23.51   | N/A                           | N/A; 55.5                                | 0.29, 0.36 | 71   | 4c               |
|                         | 22.57   | N/A                           | 37.27; 20.88                             | 0.34, 0.35 | 73   | 4d               |
|                         | 15.0    | N/A                           | 40.0; 30.0                               | 0.33, 0.44 | < 70 | 4e               |
|                         | 26      | 16.4                          | 70.6; 47.6                               | 0.38, 0.43 | 62   | 4f               |
|                         | 12.73   | 11.51                         | 27.44; 17.01                             | 0.41, 0.45 | 74   | 4g               |
|                         | 10.02   | N/A                           | 21.10; 20.71                             | 0.32, 0.33 | 85   | 4h               |
|                         | 11.93   | N/A                           | 30.76; 21.93                             | 0.34, 0.43 | 75   | 4i               |
|                         | 11.5    | N/A                           | 29.3; 19.7                               | 0.44, 0.38 | 70   | 4j               |
|                         | 14.2    | N/A                           | 38.8; 20.3                               | 0.33, 0.42 | 70   | 4k               |
| Three-/four-color WOLED | N/A     | N/A                           | 9.8; 8.9                                 | 0.36, 0.37 | 91   | 5a               |
|                         | 12.6    | N/A                           | 15.6; 10.4                               | 0.36, 0.33 | 90   | 5b               |
|                         | N/A     | N/A                           | 18.9; 9.6                                | 0.45, 0.44 | 91   | 5c               |
|                         | 5.38    | N/A                           | 10.19; 6.10                              | 0.35, 0.35 | 92   | 5d               |
|                         | 10.9    | N/A                           | 27.6; 16.4                               | 0.38, 0.47 | 71   | 4e               |



**Table S4.** Key performances of vacuum-deposited WOLEDs with CRI  $\geq 90$  reported in the literature.

| EQE <sub>max</sub> [%] | CE <sub>max</sub> [cd A <sup>-1</sup> ] | PE <sub>max</sub> [lm W <sup>-1</sup> ] | CIE [x, y] | CRI  | Ref. |
|------------------------|-----------------------------------------|-----------------------------------------|------------|------|------|
| 6.5                    | N/A                                     | 9.0                                     | 0.46,0.45  | 90   | 12a  |
| 4.13                   | 8.27                                    | 5.48                                    | 0.35,0.36  | 97   | 12b  |
| 4.14                   | 8.78                                    | 5.63                                    | 0.32, 0.34 | 94   |      |
| 10.3                   | 24.0                                    | 16.4                                    | 0.32,0.35  | 94   | 12c  |
| N/A                    | N/A                                     | 8.3                                     | 0.33,0.36  | 96   | 12d  |
| N/A                    | N/A                                     | 23.3                                    | 0.43, 0.46 | 93   | 12e  |
| N/A                    | N/A                                     | N/A                                     | 0.32,0.34  | 91.2 | 12f  |
| N/A                    | 12.5                                    | 7.86                                    | 0.45, 0.40 | 96   | 12g  |
| N/A                    | N/A                                     | 24.8                                    | 0.46,0.46  | 92   | 12h  |
| N/A                    | N/A                                     | 5.5                                     | 0.49, 0.41 | 91.3 | 12i  |
| 15.6                   | 23.1                                    | 20.6                                    | 0.54,0.42  | 95   | 12j  |
| 17.71                  | 34.15                                   | 29.51                                   | 0.50,0.44  | 94   | 12k  |
| N/A                    | 9.52                                    | 11.08                                   | 0.25,0.26  | 93   | 12l  |
| N/A                    | 21.71                                   | 18.08                                   | 0.49,0.42  | 94   | 12m  |
| 14.20                  | 13.37                                   | 12.92                                   | 0.55,0.38  | 95   | 12n  |

## References:

- [1] D. Zhou, G. Cheng, G. S. M. Tong, C.-M. Che, *Chem. Eur. J.* **2020**, *26*, 15718–15726.
- [2] D. Zhou, W.-P. To, Y. Kwak, Y. Cho, G. Cheng, G. S. M. Tong, C.-M. Che, *Adv. Sci.* **2019**, *6*, 1802297.
- [3] P. C. Wei, D. D. Zhang, L. Duan, *Adv. Funct. Mater.* **2020**, *30*, 1907083.
